# Supplementary material for: Poly(acrylic acid)/Dipeptide Double-Network Hydrogel to Achieve a Highly Stretchable Strain Sensor
Source: MDPI journal article supplement (doi:10.3390/chemosensors10090360), 2022-09-09
Supplement: s1 [file s1]

# Poly(Acrylic Acid)/Dipeptide Double-Network Hydrogel to Achieve a Highly Stretchable Strain Sensor

Xin Luo, Boya Ding and Xingcen Liu \*

Key Laboratory of Colloid and Interface Chemistry of the Ministry of Education,  
School of Chemistry and Chemical Engineering, Shandong University, Jinan  
250100, China

\* Correspondence: liuxingcen@sdu.edu.cn

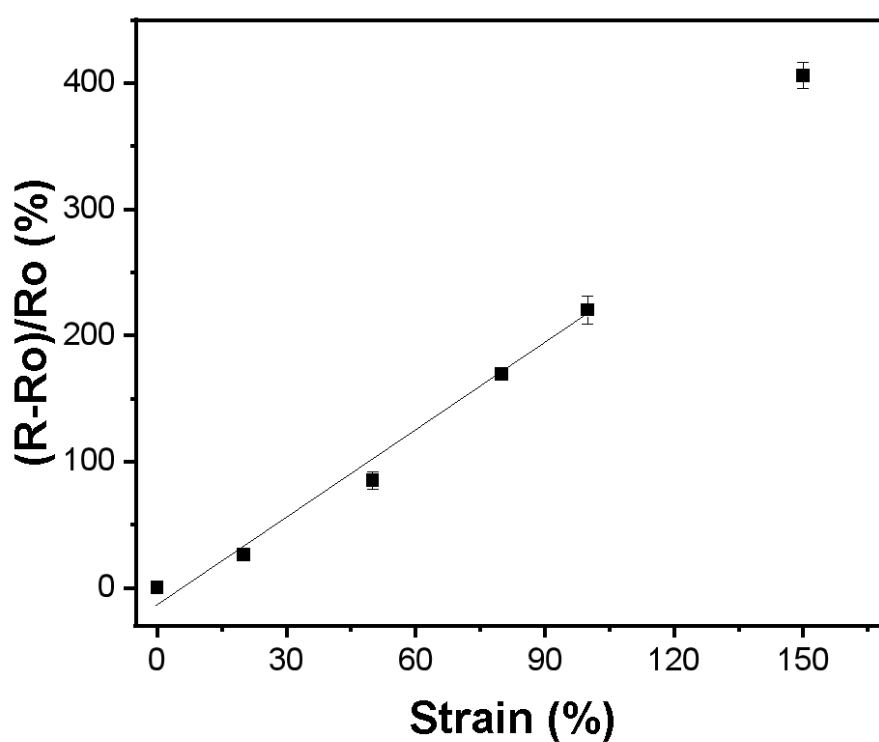

Figure S1. Relative resistance change of gels as a function of the applied strain.

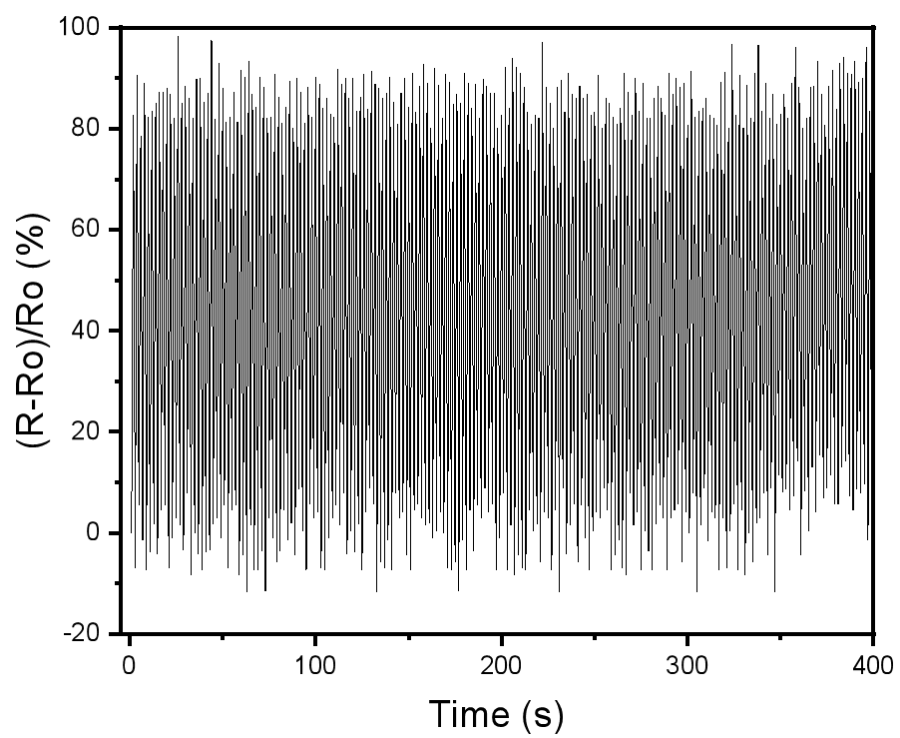

Figure S2. Cyclic stability of gels after repeated stretching with a strain of 50% for 200 cycles.
